# Supplementary material for: The scaffolding function of LSD1/KDM1A reinforces a negative feedback loop to repress stem cell gene expression during primitive hematopoiesis
Source: PubMed Central journal article supplement — iScience. 2022 Dec 5;26(1):105737. doi: 10.1016/j.isci.2022.105737 (PMC9803847; doi:10.1016/j.isci.2022.105737), 2022-12-05
Supplement: mmc1.pdf [file mmc1.pdf]

**Supplemental information**

**The scaffolding function of LSD1/KDM1A reinforces  
a negative feedback loop to repress stem cell gene  
expression during primitive hematopoiesis**

**Mattie J. Casey, Alexandra M. Call, Annika V. Thorpe, Cicely A. Jette, Michael E. Engel, and Rodney A. Stewart**

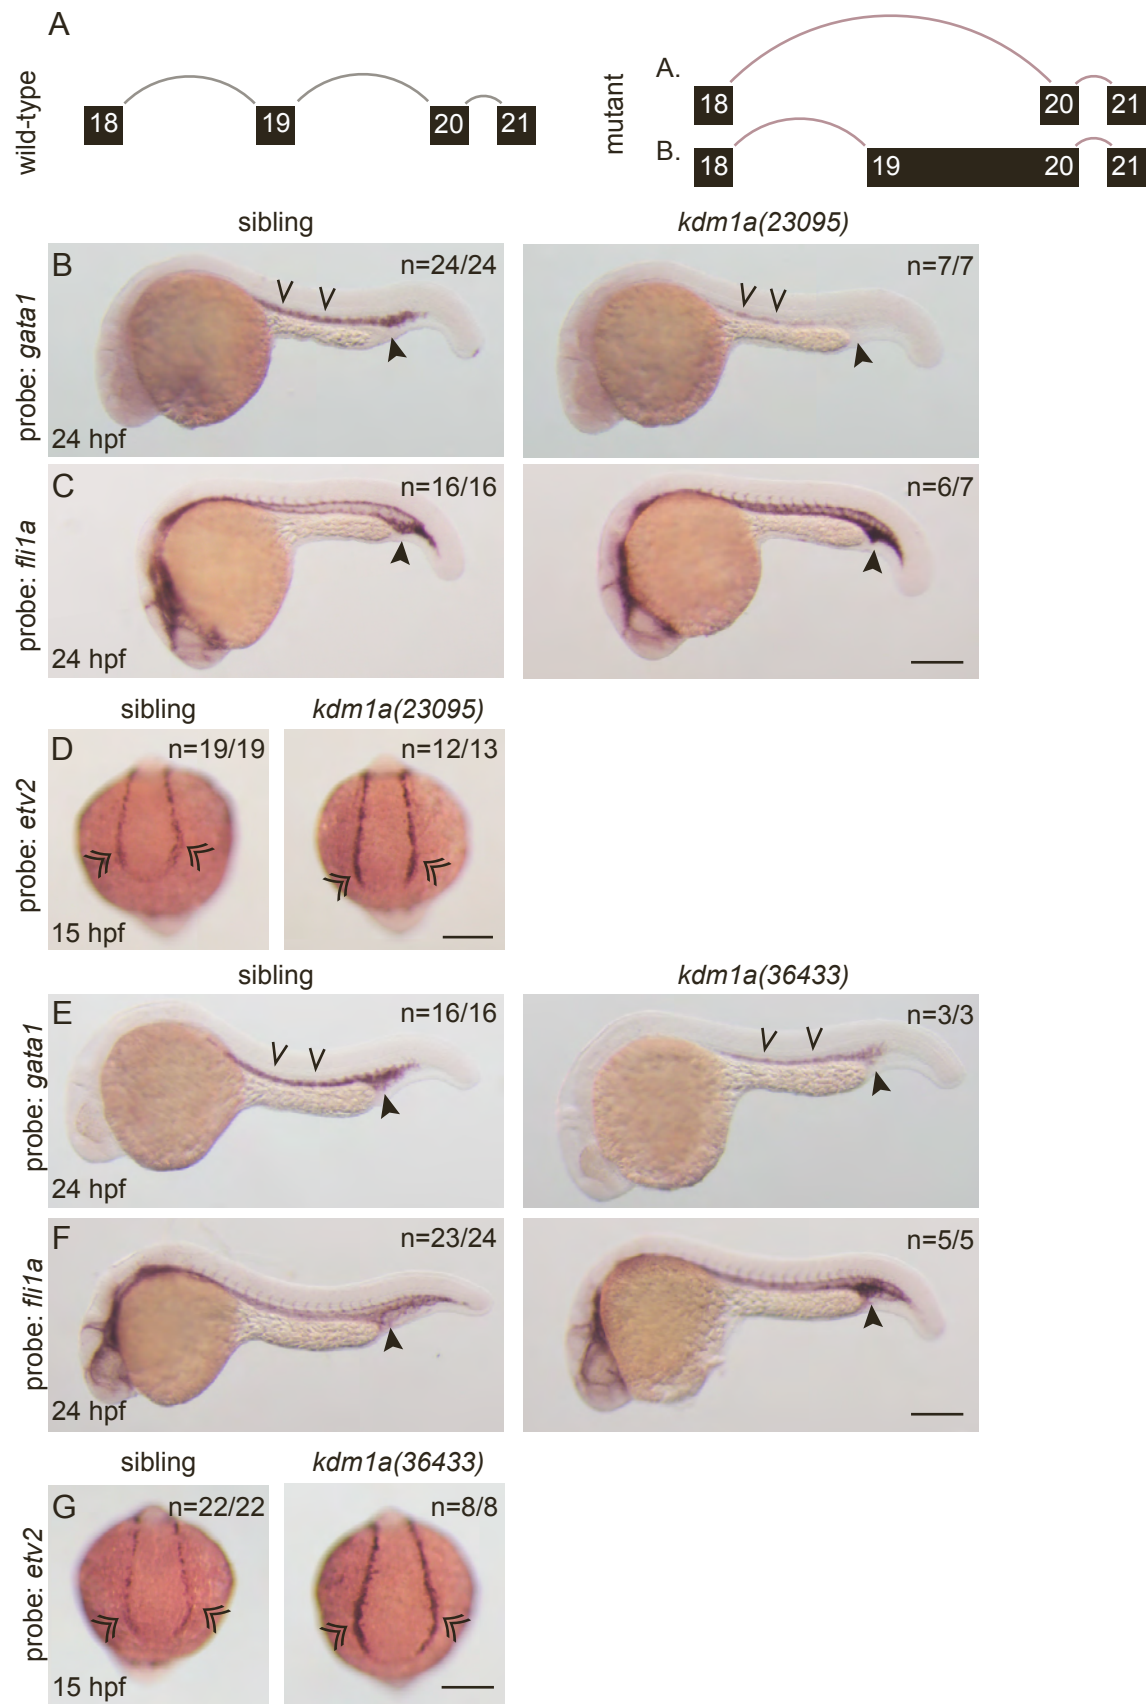

**Figure S1. Hematopoietic transcription factors are dysregulated in *Isd1* mutants, related to Figure 1.** (A) Wild-type and mutant *kdm1a(23095)* splice variations between exons 18-21 are shown in the schematic. (B-G) WISH of embryos derived from an incross of *kdm1a(23095)* heterozygotes (B-D) or *kdm1a(36433)* heterozygotes (E-G) using probes to detect *gata1* (B,E), *fli1a* (C,F), and *etv2* (D,G). Representative images are shown with the number of animals with similar staining patterns for the indicated genotype shown in the upper right corner of each image. The lower left corner indicates the approximate stage of the animal at the time of fixation. Embryos were imaged, blindly scored by expression and then genotyped by HRMA. Carons indicate ICM expression; closed arrowheads indicate posterior blood island/caudal hematopoietic tissue; double carons indicate posterior lateral mesoderm. Scale bar, 200  $\mu$ m.

Activated Caspase-3

*plrg1(hi3174aTg)*

sibling

*kdm1a(23095)*

n=4/4

n=20/20

n=3/3

n=12/12

*kdm1a(36433)*

sibling

*plrg1(hi3174aTg)*

Phospho-histone H3

sibling

*kdm1a(23095)*

Phospho-histone H3 Cell Counts

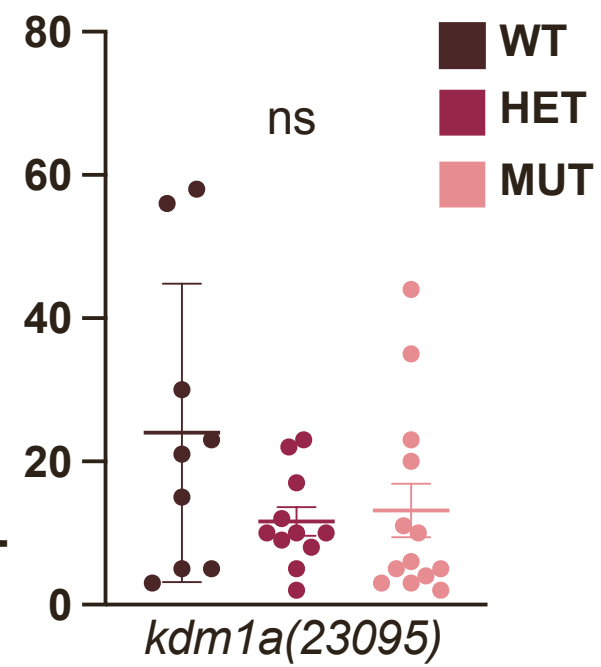

sibling

*kdm1a(36433)*

Phospho-histone H3 Cell Counts

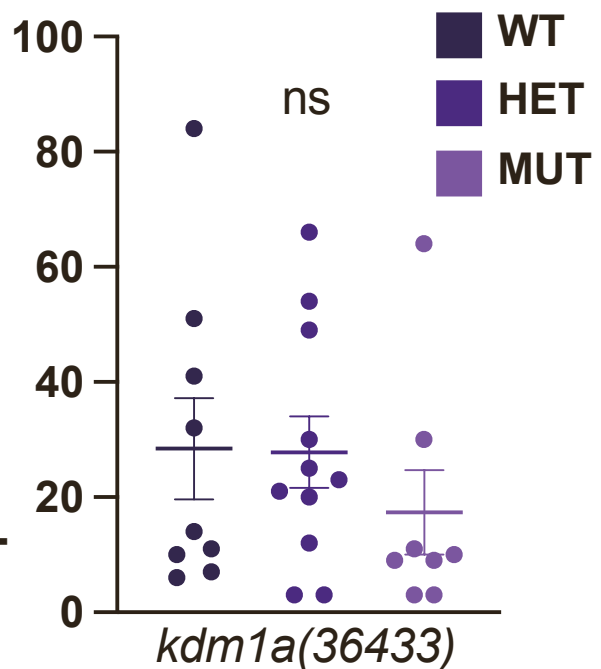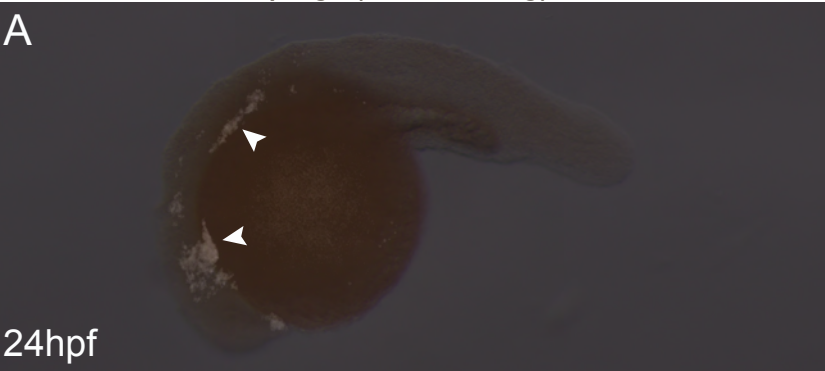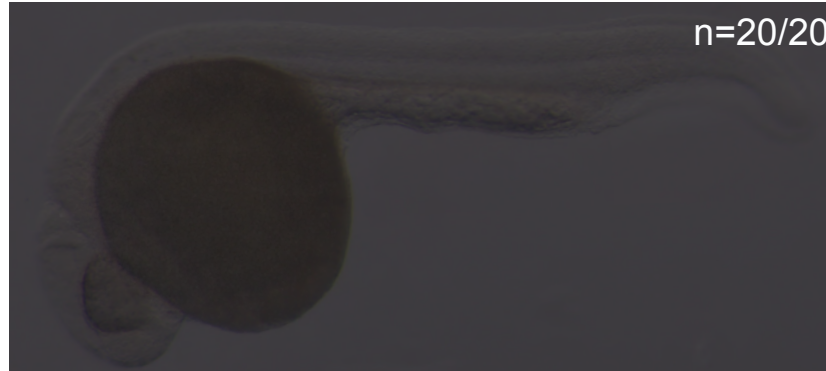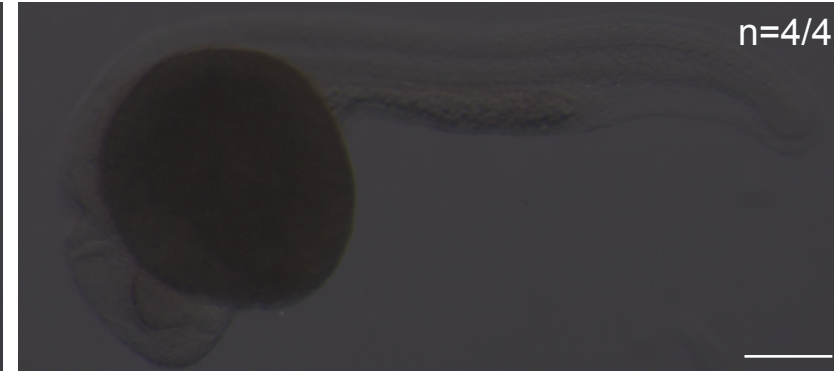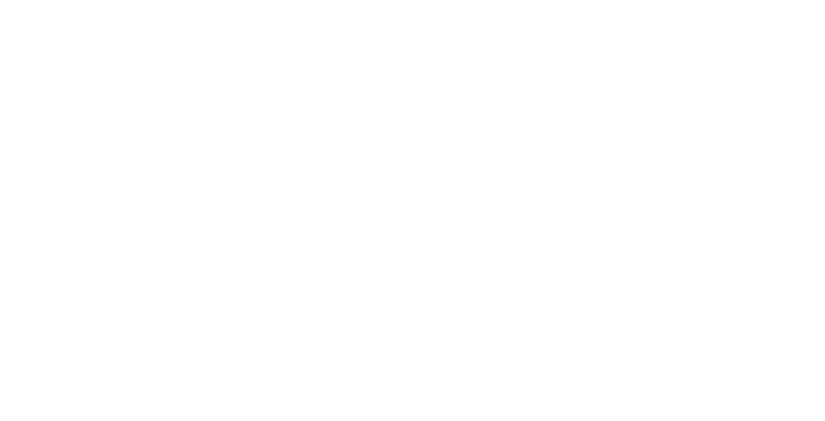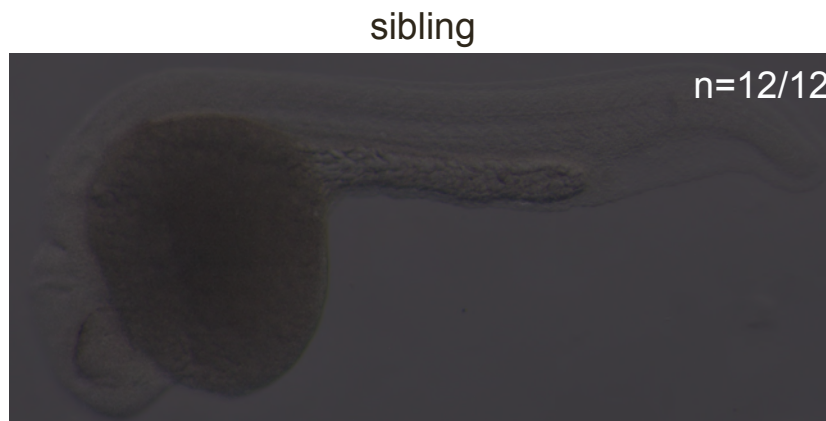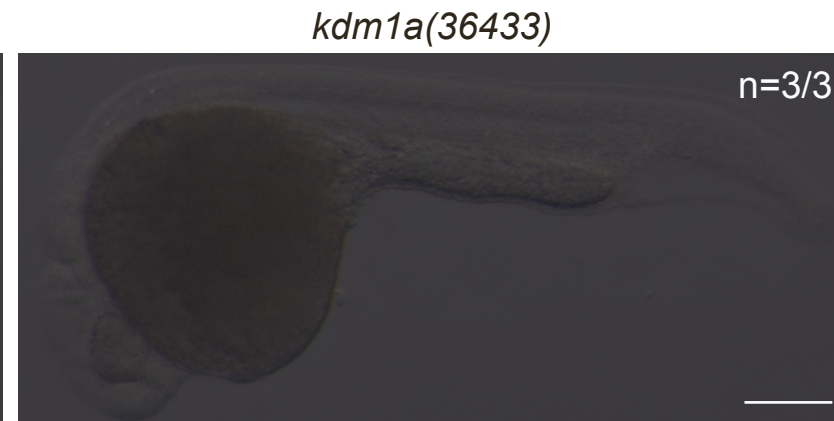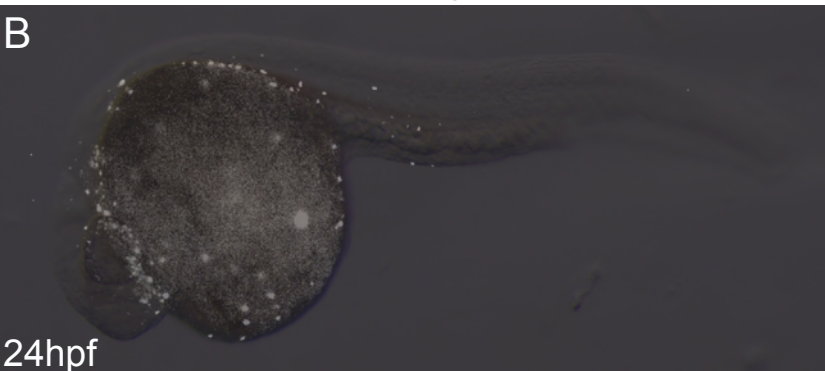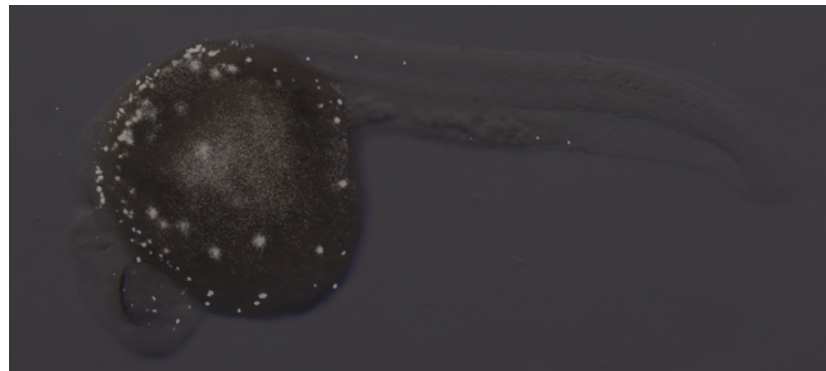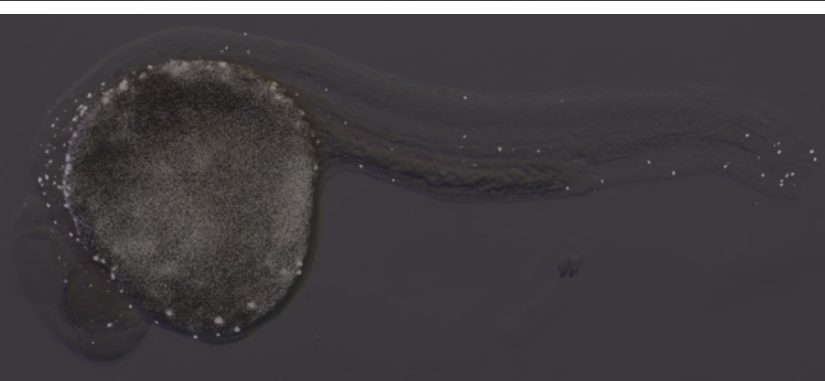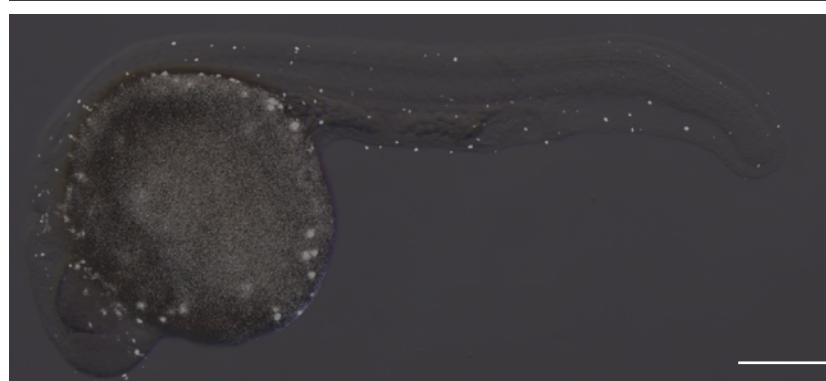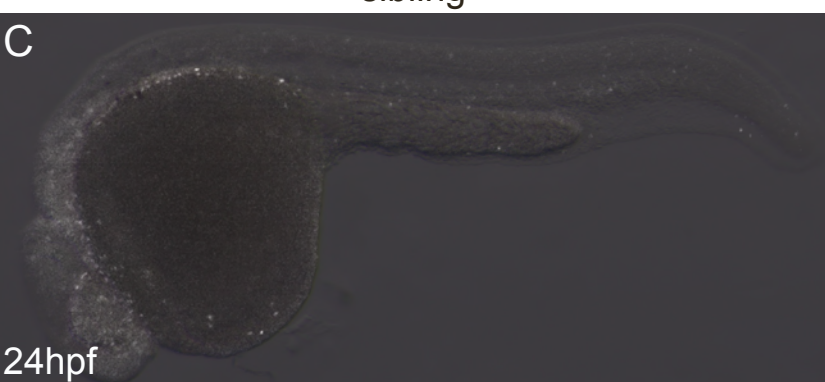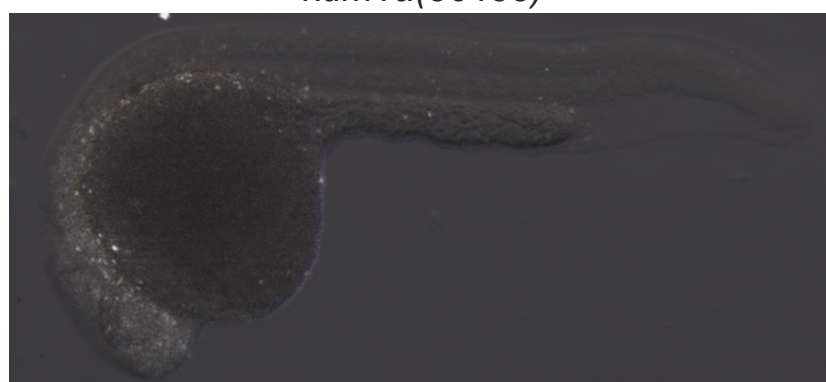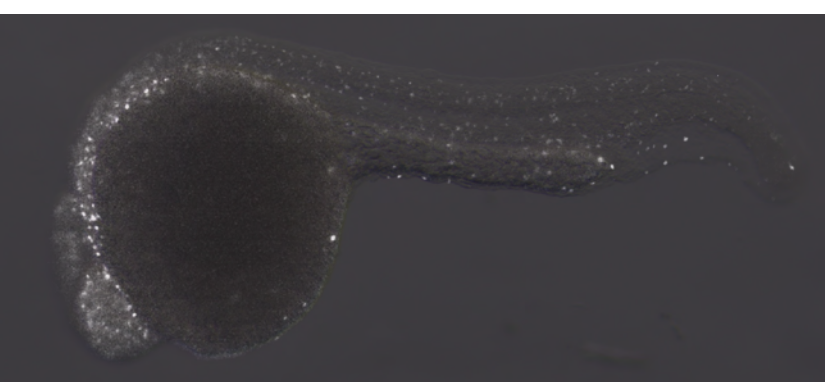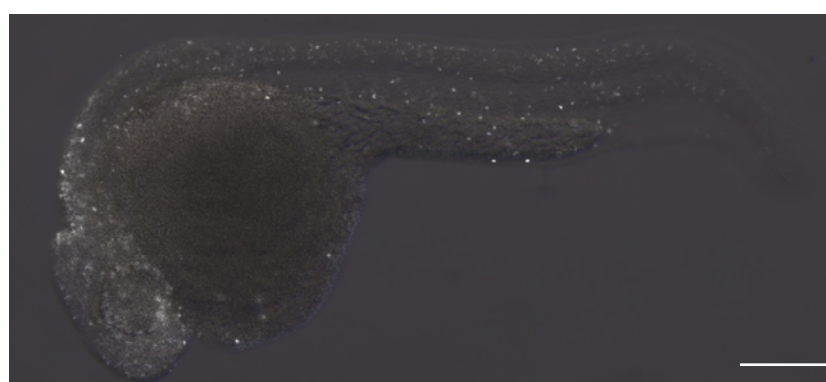



**Figure S2. Cell death is not increased in *Isd1* mutants, related to Figure 1.** (A) Immunofluorescence of activated Caspase-3 in 24-hpf *kdm1a(23095)* and *kdm1a(36433)* mutants. As a positive control for the assay, *plrg1(hi3174aTg)* mutants were used. Representative images are shown with the number of animals with similar staining patterns for the indicated genotype shown in the upper right corner of each image. (B-C) Immunofluorescence of phospho-histone H3 in 24-hpf *kdm1a(23095)* (B) and *kdm1a(36433)* (C) mutants. Staining variability is shown for both siblings and mutants. Quantification of the number of phospho-histone-H3-positive cells in the tail is shown on the right. Each point represents an individual animal. The number of phospho-histone-H3-positive cells in the tail were measured using the Analyze Particles tool on ImageJ without size exclusion. Data is not statistically significant. The brightness of raw images of both siblings and mutants were adjusted to the same level using Photoshop (Adobe 2017). ns, not significant. Scale bar, 200  $\mu$ m.

sibling

*kdm1a(36433)*

probe: *gfi1ab*

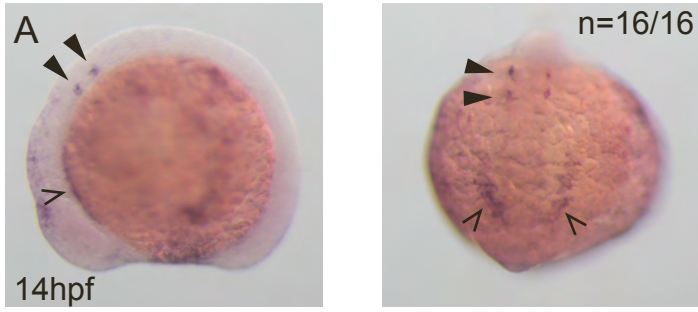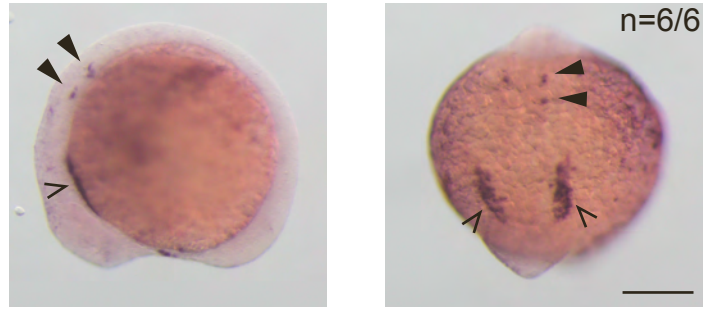

sibling

*kdm1a(23095)*

probe: *gfi1ab*

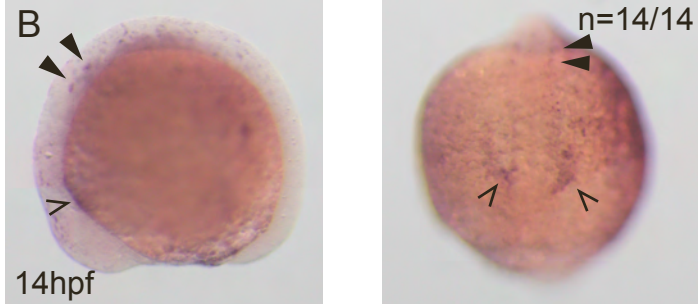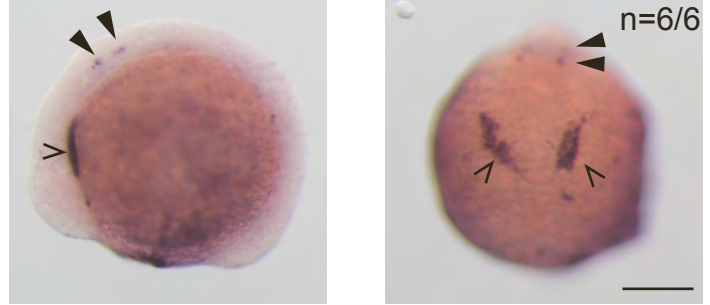

probe: *gfi1ab*

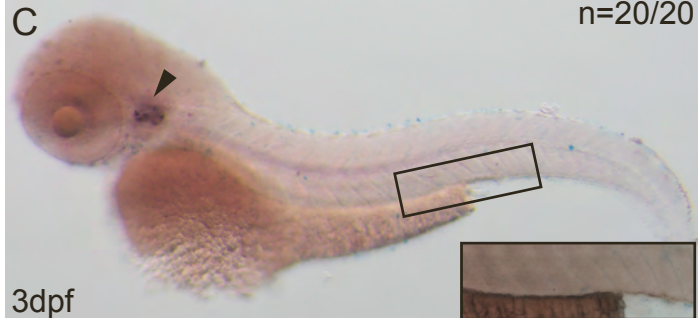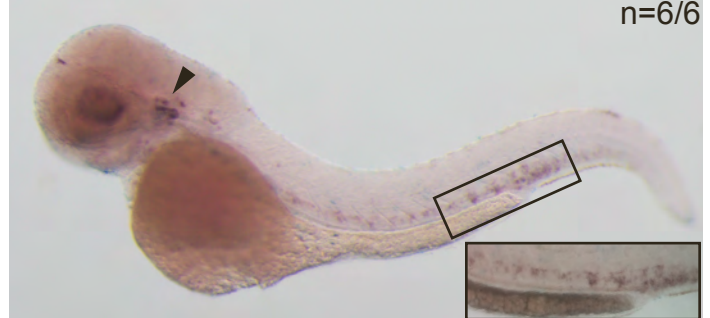

probe: *gfi1b*

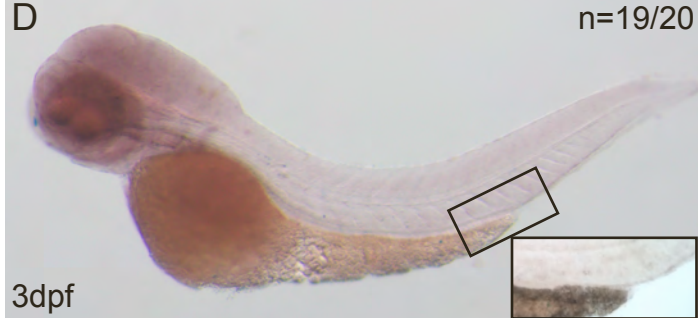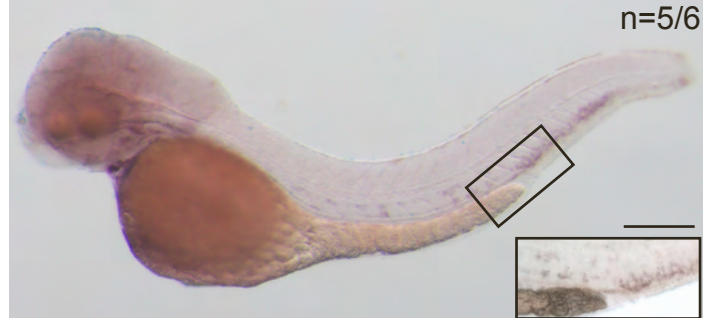

**Figure S3. GFI-family genes are dysregulated throughout development, related to Figure 2.** (A-B) WISH of *gfi1ab* of 14-hpf embryos from an incross of *kdm1a(36433)* (A) or *kdm1a(23095)* (B) heterozygotes. Lateral (left) and dorsal (right) views are shown. (C-D) WISH of embryos derived from an incross of *kdm1a(23095)* heterozygotes using probes to detect *gfi1ab* (C) or *gfi1b* (D) at 3 dpf. Representative images are shown with the number of animals with similar staining patterns for the indicated genotype shown in the upper right corner of each image. The lower left corner indicates the approximate stage of the animal at the time of fixation. Embryos were imaged, blindly scored by expression levels and then genotyped by HRMA. Narrow triangles indicate inner-hair-cell expression. Scale bar, 200  $\mu$ m.

**A**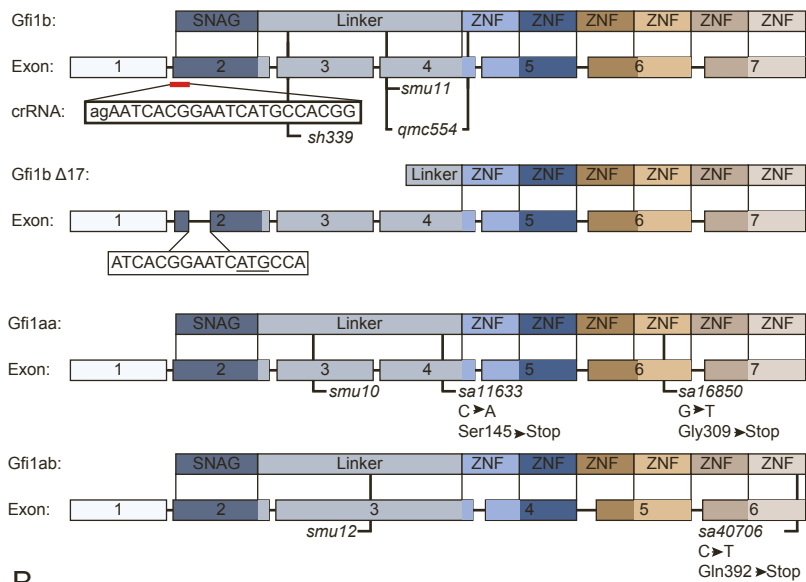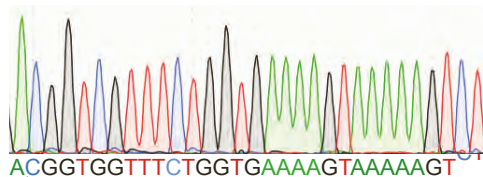**C**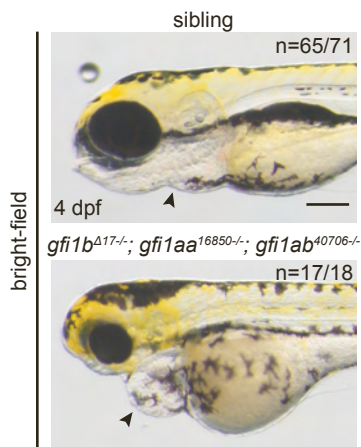**B**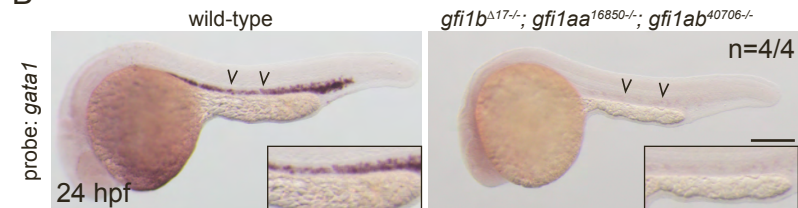



**Figure S4. Triple-*gfi*-mutant zebrafish phenocopy *lsd1* mutants, related to Figure 2.** (A) Schematic of the structure of zebrafish *Gfi1b*, *Gfi1aa*, and *Gfi1ab* proteins and corresponding genetic mutations relevant to this study. The mRNA sequence of *gfi1b* $\Delta$ 17 is shown on the right. (B) WISH to detect *gata1* in embryos derived from an incross of either *gfi1b* $\Delta$ 17/ $\Delta$ 17; *gfi1aa*<sup>16850/16850</sup>; *gfi1ab*<sup>40706/+</sup> triple mutants or wild-type zebrafish. A representative image of a *gfi1b* $\Delta$ 17/ $\Delta$ 17; *gfi1aa*<sup>16850/16850</sup>; *gfi1ab*<sup>40706/40706</sup> mutant animal is shown with the number of animals with similar staining patterns for that genotype indicated in the upper right corner. The lower left corner indicates the approximate stage of the animal at the time of fixation. Embryos were imaged and genotyped by HRMA. Wild-type embryos were included within each well to control for staining. Carons, ICM expression. (C) Brightfield image of 4-dpf embryos from a *gfi1b* $\Delta$ 17/ $\Delta$ 17; *gfi1aa*<sup>16850/16850</sup>; *gfi1ab*<sup>40706/+</sup> triple-mutant incross. Embryos with small heads and edema were genotyped via HRMA, and the number of animals with the phenotype shown and corresponding genotype is indicated. Scale bar, 200  $\mu$ m.

A

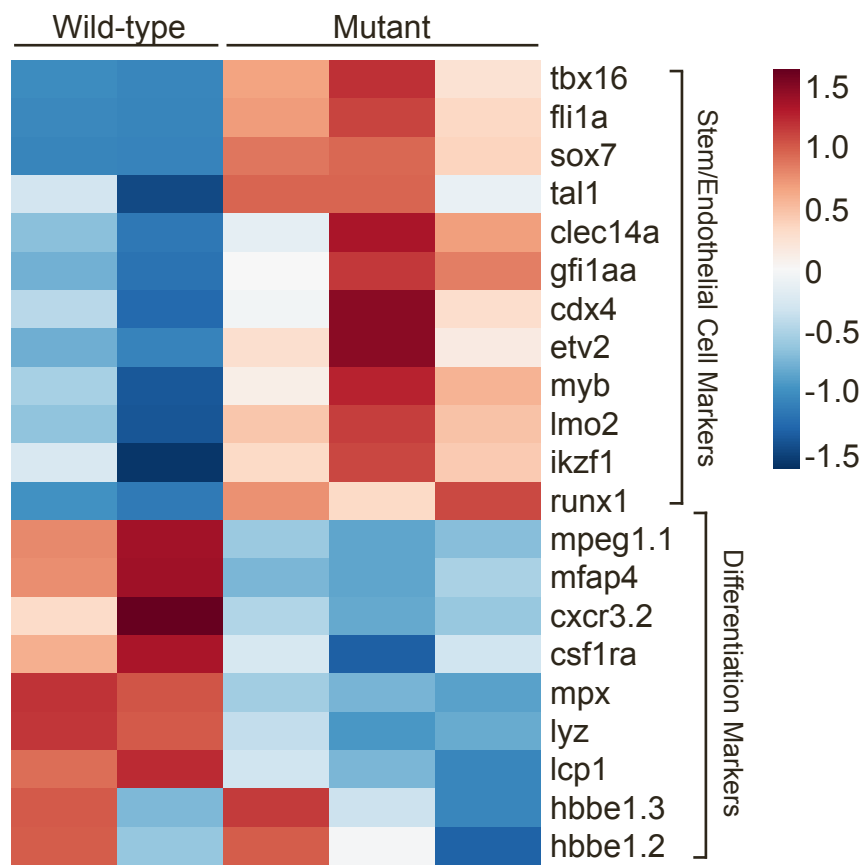

**Figure S5. Hematopoietic progenitor markers are upregulated at the expense of differentiation markers, related to Figure 3.** (A) Heatmap of *kdm1a(23095)* mutants compared to wild-type siblings for the differential expression of stem/endothelial-cell-specific genes and myeloid- and erythroid-cell-specific genes (“Differentiation markers”).

A

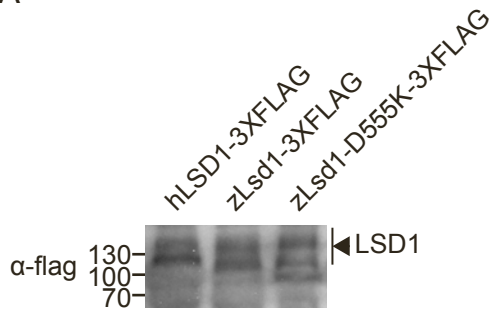

B

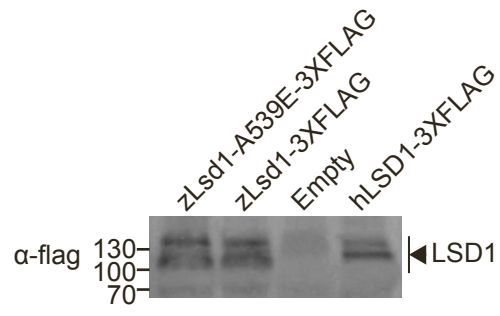

**Figure S6. FLAG-tagged rescue constructs are translated to protein *in vivo*, related to Figure 4 and Figure 6.** (A-B) Immunoblotting with an anti-Flag antibody of protein lysate from wild-type zebrafish injected with the indicated 3XFLAG-tagged mRNA constructs.



sibling

*kdm1a(36433)*

*kdm1a(36433)*

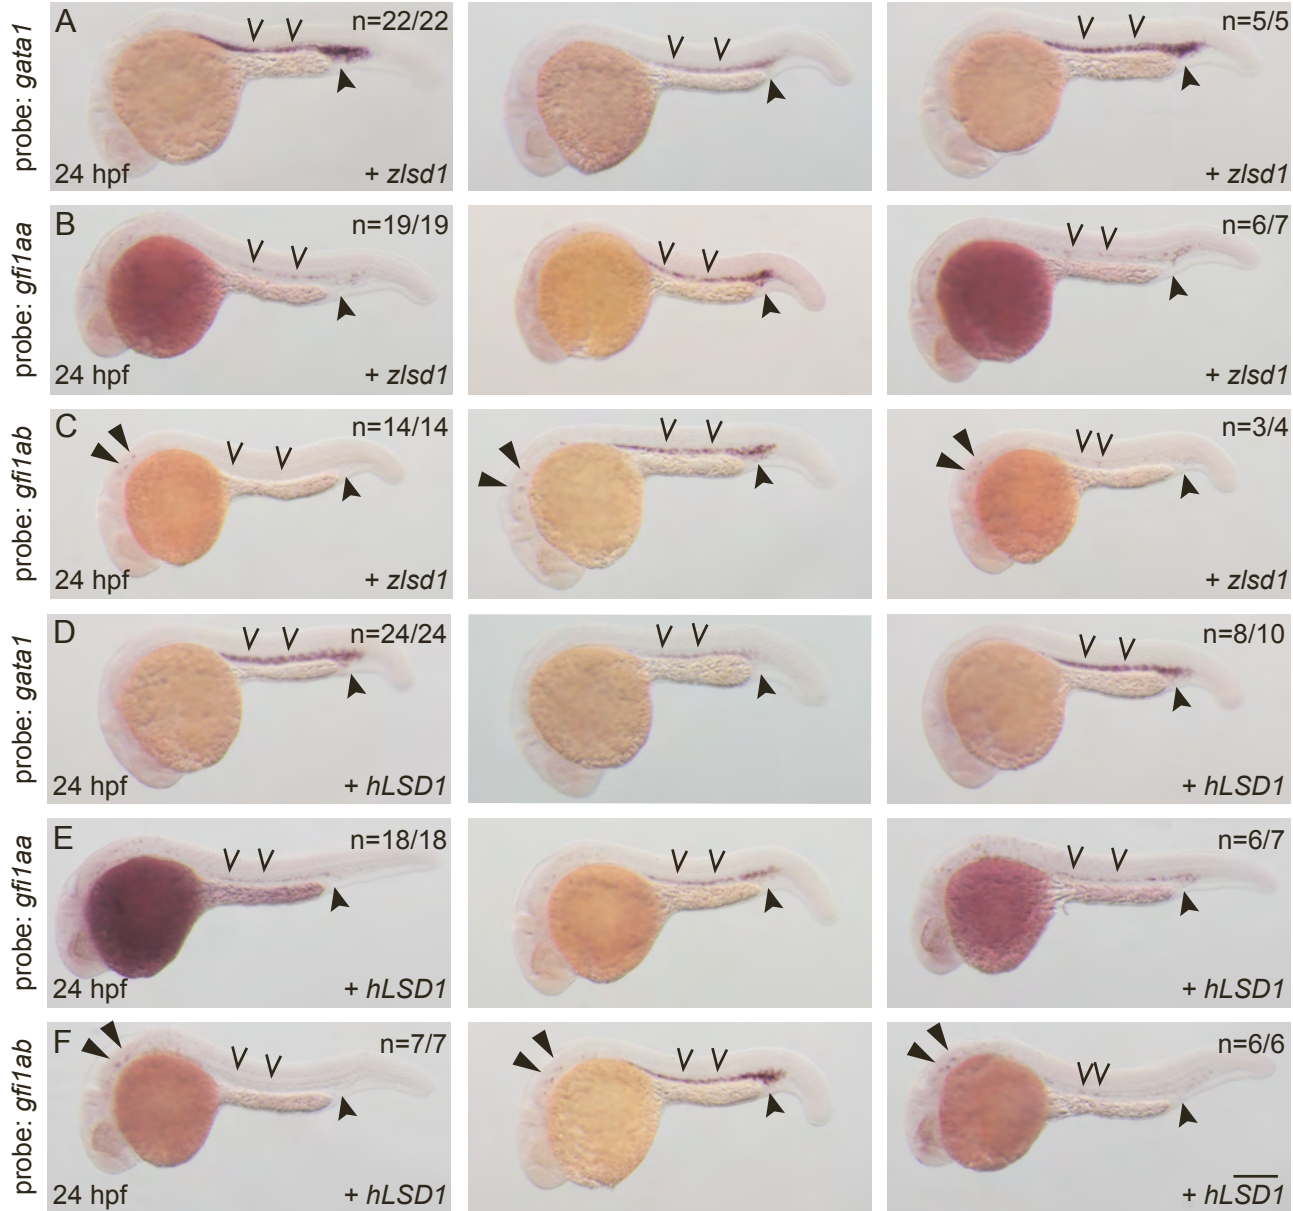

**Figure S7. Wild-type *Isd1* rescues hematopoietic transcription factor gene expression in *kdm1a(36433)* mutants, related to Figure 4.** Single-cell zebrafish embryos derived from an incross of *kdm1a(36433)* heterozygotes were injected with either *zIsd1* (A-C) or *hLSD1* mRNA (D-F). WISH was then performed at 24 hpf with the indicated probes. Representative images are shown with the number of animals with similar staining patterns for the indicated genotype shown in the upper right corner. The lower right corner indicates the mRNA injection conditions. Uninjected mutant embryos are shown in the middle column for comparison. Embryos were imaged, blindly scored by expression and then genotyped by HRMA. Carons indicate ICM expression; closed arrowheads indicate posterior blood island/caudal hematopoietic tissue; narrow triangles indicate inner-hair-cell expression. Scale bar, 200  $\mu$ m.

sibling

*kdm1a(23095)**kdm1a(23095)*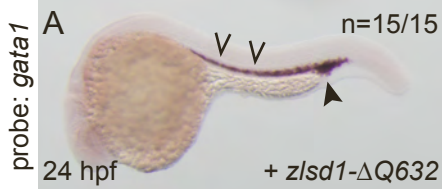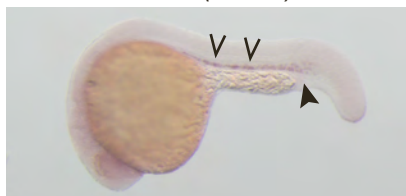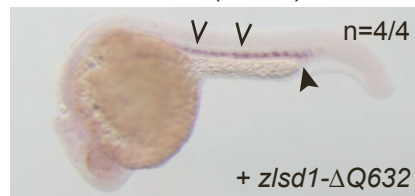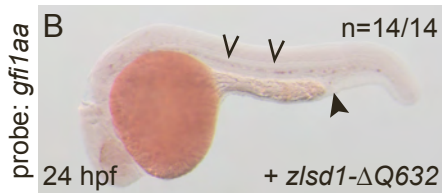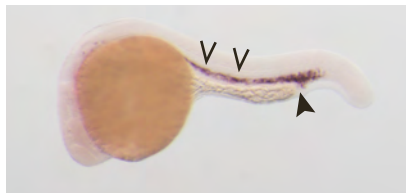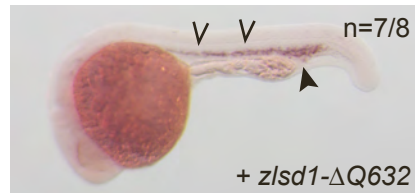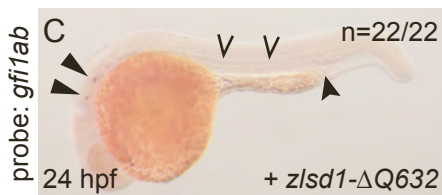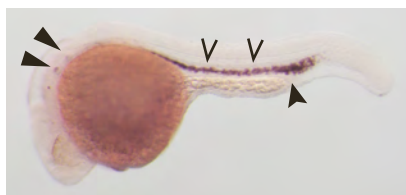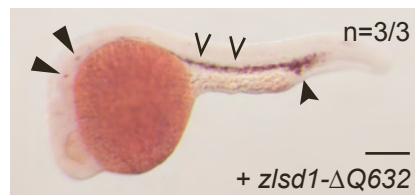

sibling

*kdm1a(36433)**kdm1a(36433)*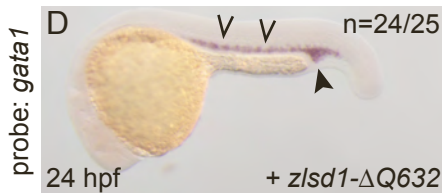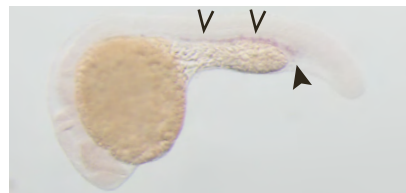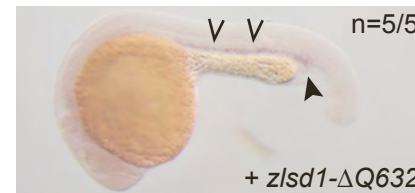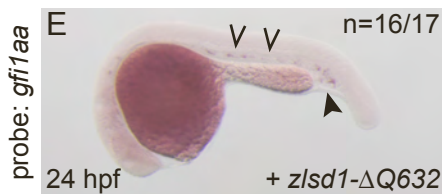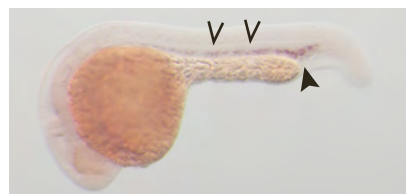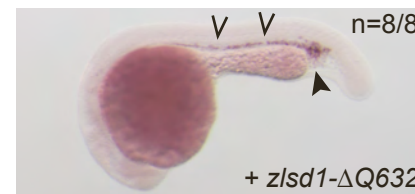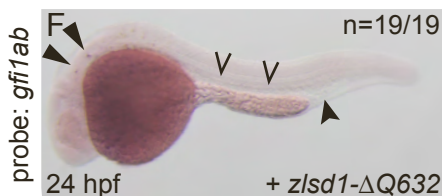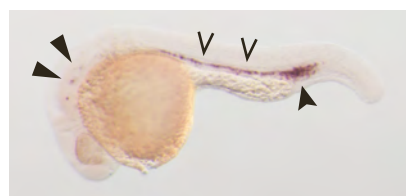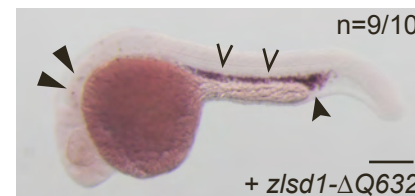

**Figure S8. Truncated *Isd1* is unable to rescue gene expression in *Isd1* mutants, related to Figure 4.** Single-cell zebrafish embryos from an incross of *kdm1a(23095)* heterozygotes (A-C) or *kdm1a(36433)* heterozygotes (D-F) were injected with *zIsd1-ΔQ632* mRNA. WISH was then performed at 24 hpf with the indicated probes. Representative images are shown with the number of animals with similar staining patterns for the indicated genotype shown in the upper right corner. The lower right corner indicates the mRNA injection conditions. Uninjected mutant embryos are shown in the middle column for comparison. Embryos were imaged, blindly scored by expression and then genotyped by HRMA. Carons indicate ICM expression; closed arrowheads indicate posterior blood island/caudal hematopoietic tissue; narrow triangles indicate inner-hair-cell expression. Scale bar, 200 μm.

sibling

*kdm1a(23095)*

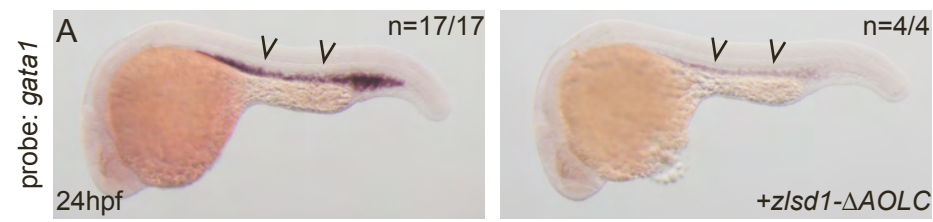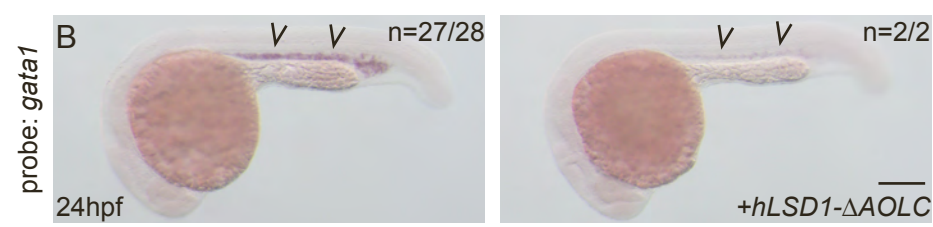

sibling

*kdm1a(36433)*

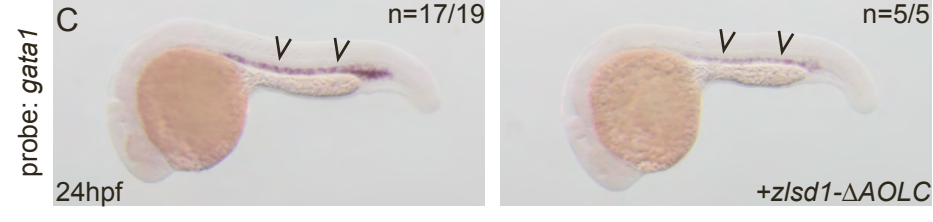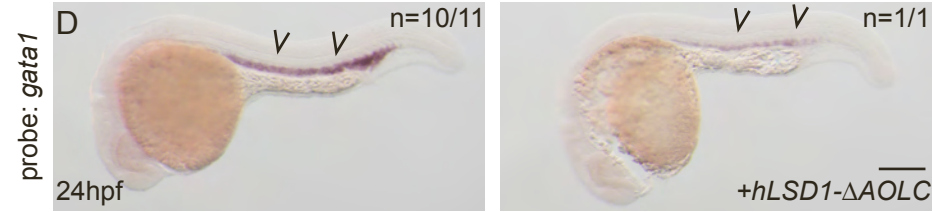



**Figure S9. *Lsd1* lacking the AOLC domain is unable to rescue gene expression in *lsd1* mutants, related to Figure 4.** (A-D) Single-cell zebrafish embryos from an incross of *kdm1a*(23095) (A-B) or *kdm1a*(36433) (C-D) heterozygotes were injected with *zlsd1-ΔAOLC* (A, C) or *hLSD1-ΔAOLC* (B, D) mRNA. WISH was then performed at 24 hpf with the indicated probes. Representative images are shown with the number of animals with similar staining patterns for the indicated genotype shown in the upper right corner. The lower right corner indicates the mRNA injection conditions. Embryos were imaged, blindly scored by expression and then genotyped by HRMA. Carons indicate ICM expression. Scale bar, 200 μm.

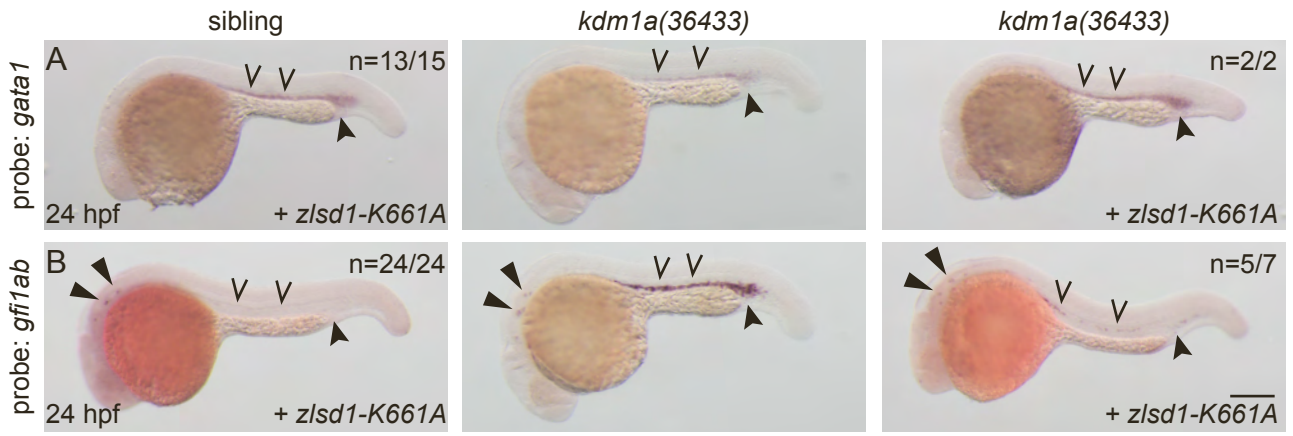

**Figure S10. Demethylase-deficient *lsd1* rescues gene expression in *kdm1a(36433)* mutants, related to Figure 5.** Single-cell zebrafish embryos from an incross between *kdm1a(36433)* heterozygotes were injected with mRNAs encoding *zlsd1-K661A*. WISH was then performed at 24 hpf for *gata1* (A) and *gfi1ab* (B) expression. Representative images are shown with the number of animals with similar staining patterns for the indicated genotype shown in the upper right corner. The lower right corner indicates the mRNA injection conditions. Uninjected mutant embryos are shown in the middle column for comparison. Embryos were imaged, blindly scored by expression and then genotyped by HRMA. Carons indicate ICM expression; closed arrowheads indicate posterior blood island/caudal hematopoietic tissue; narrow triangles indicate inner-hair-cell expression. Scale bar, 200  $\mu$ m.

sibling

*kdm1a*(23095)

probe: *gata1*

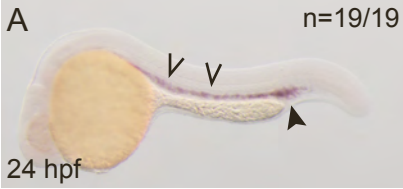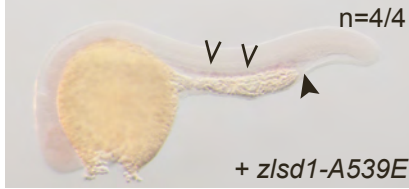

probe: *gfi1ab*

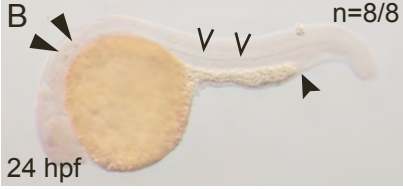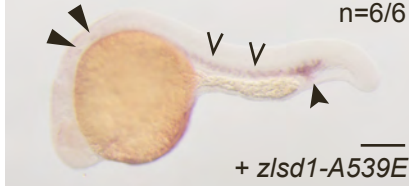

**Figure S11. Substrate-binding-mutant *lsd1* does not rescue gene expression, related to Figure 5.** (A-B) Single-cell zebrafish embryos from an incross between *kdm1a(23095)* heterozygotes were injected with *zlsd1-A539E* mRNA. WISH was performed for *gata1* (A) and *gfi1ab* (B). Representative images are shown with the number of animals with similar staining patterns for the indicated genotype shown in the upper right corner. Embryos were imaged, blindly scored by expression and then genotyped by HRMA. Carons indicate ICM expression; closed arrowheads indicate posterior blood island/caudal hematopoietic tissue; narrow triangles indicate inner-hair-cell expression. Scale bar, 200  $\mu$ m.



**Table S1: LSD1 residues within 4Å of SNAIL, Histone H3, or FAD**

| 4Å of SNAG | 4Å of H3 | 4Å of FAD | 4Å of SNAG;<br>no overlap<br>with FAD | 4Å of SNAG<br>proline |
|------------|----------|-----------|---------------------------------------|-----------------------|
| T335       | V333     | I284      | T335                                  | A539*                 |
| L386       | T335     | G285      | L386                                  | N540*                 |
| N535*      | I356     | S286      | N535*                                 | D555*                 |
| L536       | Q358     | G287      | L536                                  | A809                  |
| F538*      | L386     | V288      | F538*                                 |                       |
| A539*      | N535*    | S289      | A539*                                 |                       |
| N540*      | L536     | L307      | N540*                                 |                       |
| W552       | A539*    | E308      | W552                                  |                       |
| D553**     | N540*    | A309      | D553**                                |                       |
| D555*      | W552     | R310      | D555*                                 |                       |
| D556*      | D553**   | G314      | D556*                                 |                       |
| H564       | D555*    | G315      | H564                                  |                       |
| L677       | D556*    | R316      | L677                                  |                       |
| L693       | H564     | V317      | L693                                  |                       |
| Y761*      | W695     | L329      |                                       |                       |
| A809       | Y761*    | G330      |                                       |                       |
| T810       | A809     | A331      |                                       |                       |
|            | T810     | M332*     |                                       |                       |
|            |          | V333*     |                                       |                       |
|            |          | T588      |                                       |                       |
|            |          | A589      |                                       |                       |
|            |          | V590      |                                       |                       |
|            |          | T624      |                                       |                       |
|            |          | L625      |                                       |                       |
|            |          | P626      |                                       |                       |
|            |          | V637      |                                       |                       |
|            |          | L659*     |                                       |                       |
|            |          | K661*     |                                       |                       |
|            |          | W751      |                                       |                       |
|            |          | W756      |                                       |                       |
|            |          | S760*     |                                       |                       |
|            |          | Y761*     |                                       |                       |
|            |          | G800      |                                       |                       |
|            |          | E801      |                                       |                       |
|            |          | A809      |                                       |                       |
|            |          | T810      |                                       |                       |
|            |          | V811      |                                       |                       |
|            |          | A814      |                                       |                       |

**Table S1. LSD1 residues within 4Å of SNAIL, histone H3, or FAD, related to Figure 6.** Residues that are within 4Å of the first 6 amino acids of the SNAIL1 SNAG domain (Baron et al., 2011), the histone-H3 tail (Forneris et al., 2007) or the location of FAD are listed. Residues that are specifically within 4Å of the SNAG domain but not within 4Å of FAD are also listed, as well as residues that are within 4Å of the second proline residue of the SNAG domain. \*Residues that have been previously shown to impact LSD1 catalytic activity to any extent. \*\*Asp553 was shown to impact catalytic activity when mutated to Lys but not when mutated to Ala (Chen et al., 2006).

**Table S2: List of primers**

| <b>Primers</b>        |                           |                        |
|-----------------------|---------------------------|------------------------|
| <b>Primer Name</b>    | <b>Sequence</b>           | <b>Description</b>     |
| sa23095_HRMA_fwd      | cgatgatgtcatcgttggctcgtt  | For HRMA genotyping    |
| sa23095_HRMA_rev      | aatgaagcaagcgctccga       | For HRMA genotyping    |
| sa36433_HRMA_fwd      | gccgtgtgtgtaccctacctt     | For HRMA genotyping    |
| sa36433_HRMA_rev2     | gtcttcattctggcagaggag     | For HRMA genotyping    |
| sa23095_fwd2          | tctgaccttgcattcaca        | For PCR and sequencing |
| sa23095_rev2          | ttaaggccggtgactgaac       | For PCR and sequencing |
| sa36433_fwd           | gtctcaggtgaggtgat         | For PCR and sequencing |
| sa36433_rev2          | tttgacctaccagcccaag       | For PCR and sequencing |
| kdm1a_cr3_fwd         | agctgaagcagggttaggtt      | For PCR and sequencing |
| kdm1a_exon21_qpcr_rev | gcgtggcatagtgtacatgg      | For PCR and sequencing |
| sa16850_HRMA_rev1     | cctgtatgaatgaacgtgtgctt   | For HRMA genotyping    |
| sa16850_HRMA_fwd2     | actcggacaccagaccgtatc     | For HRMA genotyping    |
| sa40706_HRMA_fwd1     | gtttgatgtgaccttgtgga      | For HRMA genotyping    |
| sa40706_HRMA_rev1     | gacgcatgttctcacttcag      | For HRMA genotyping    |
| zGfi1B-REV-E2         | tcgttggctgatgcacattat     | For HRMA genotyping    |
| gfi1b_HRMAfwd_MC2     | cgaaagcatctcagtaaacaatctc | For HRMA genotyping    |
| zgfi1aa_sa16850_fwd2  | ttgcaggaaagggtcttcag      | For PCR and sequencing |
| zgfi1aa_sa16850_rev1  | cctattgaaggcaagcctaag     | For PCR and sequencing |
| zgfi1ab_sa40706_fwd2  | tgtcgcagttgagaggaaaa      | For PCR and sequencing |
| zgfi1ab_sa40706_rev1  | acatgaaagctgccagacct      | For PCR and sequencing |
| zgfi1b_e2fwd_seq      | tcgtagcctattgcattgtca     | For PCR and sequencing |

|                      |                                               |                              |
|----------------------|-----------------------------------------------|------------------------------|
| zGfi1b-REV-E2-a      | gcgcgaggagttttgtggagcttggt                    | For PCR and sequencing       |
| gfi1aa_ish_fwd       | attggtgaccctgaagctga                          | To clone from cDNA           |
| gfi1aa_ish_rev       | agtgtctcacgtgcaagcaa                          | To clone from cDNA           |
| gfi1ab_ish_fwd       | gggacatatgaggcagagga                          | To clone from cDNA           |
| gfi1ab_ish_rev2      | aatctcgtggacgcatgttt                          | To clone from cDNA           |
| gfi1b_ish_fwd1       | atgccacggctcgtttctggt                         | To clone from cDNA           |
| gfi1b_ish_rev1       | aacaaccatctgtcgccttc                          | To clone from cDNA           |
| fli1a_ish_fwd1       | cgcaaaatggacggaactat                          | To clone from cDNA           |
| fli1a_ish_rev1       | agctccagtatggggttgtg                          | To clone from cDNA           |
| zkdm1a_k661a_sdm_fwd | atgggctttggaaatctcaacgcggtggtgtgtgttttgatag   | For SDM of zLSD1 to K661A    |
| zkdm1a_k661a_sdm_rev | ctatcaaaacacaacaccaccgcttgagatttccaaagcccat   | For SDM of zLSD1 to K661A    |
| zlsd1_36433sdm_fwd   | gggagtgatgaaatagcagccgccggcc                  | For SDM of zLSD1 to Q632Stop |
| zlsd1_36433sdm_rev   | ggccggcggctgctatttcatcactccc                  | For SDM of zLSD1 to Q632Stop |
| zlsd1_d535k_fwd      | tcactcaaacactgggatcagaaggatgatttgagtttacgggc  | For SDM of zLSD1 to D555K    |
| zlsd1_d535k_rev      | gcccgtaaactcaaaatcatccttctgatcccagtgtttgagtga | For SDM of zLSD1 to D555K    |
| zlsd1_a539e_fwd      | tgcaaacctggagtttgagaatgccacaccgctgtc          | For SDM of zLSD1 to A539E    |
| zlsd1_a539e_rev      | gacagcgggtgtggcatttctcaaacctccaggtttgca       | For SDM of zLSD1 to A539E    |
| zDeltaTower_fwd      | gctcaagagaccgtcagattcttgactgg                 | To delete zLSD1 Tower domain |

|                  |                                                                |                               |
|------------------|----------------------------------------------------------------|-------------------------------|
| zDeltaTower_rev  | ggtctcttgagctgtatgaccacttccagtgcttg                            | To delete zLSD1 Tower domain  |
| Gfi1b_ish_mc2fwd | gccactcaaacaatcaaagga                                          | For RT-PCR of gfi1b           |
| Gfi1b_ish_rev1   | aacaaccatctgtcgcttc                                            | For RT-PCR of gfi1b           |
| Gfi1b_rev_e3b    | gcgcgagtgatgggattgggcagt                                       | For sequencing RT-PCR product |
| Gfi1b_e2_s2      | ggatcctaatacgactcactataggaatcacggaatcat<br>gccaagtttagagctagaa | For generating sgRNA          |

**Table S3: List of RNA probes**

| <b>WISH probe</b> | <b>Reference</b>     |
|-------------------|----------------------|
| gata1             | Detrich et al., 1995 |
| fli1a             | This paper           |
| etv2              | Sumanas et al., 2005 |
| gfi1b             | This paper           |
| gfi1aa            | This paper           |
| gfi1ab            | This paper           |
| snail1a           | Thisse et al., 1993  |
| snail1b (sna2)    | Thisse et al., 1995  |
| snai2 (slug)      | Thisse et al., 2001  |

**Table S4. List of differentially expressed genes, related to Figure 3.** Genes were filtered to include those that were protein-coding and with  $p_{adj} < 0.05$ .
